# Supplementary material for: Temperament and Character in the Child and Adolescent Twin Study in Sweden (CATSS): Comparison to the General Population, and Genetic Structure Analysis
Source: PLoS One. 2013 Aug 5;8(8):e70475. doi: 10.1371/journal.pone.0070475 (PMC3734246; doi:10.1371/journal.pone.0070475)
Supplement: File S1 — Table S1-Table S3. Table S1. Correlations between TCI dimension in the Brändström study. Correlation coefficients between the 125- and 238-items TCI dimensions showed in the black fields, those within the TCI −238 dimensions in white, and correlations within the TCI-125 dimensions in grey. Table S2. Correlations between TCI dimension in the Garcia study. Correlation coefficients between the 125- and 238-items TCI dimensions showed in the black fields, those within the TCI −238 dimensions in white, and correlations within the TCI-125 dimensions in grey. Table S3. Correlations between TCI dimensions (short version) in the whole twin sample (CATSS-15 and DOGSS). (DOCX) [file pone.0070475.s001.docx]

SUPPORTING INFORMATION

Temperament and Character in the Child and Adolescent Twin Study in Sweden (CATSS): Validation, Comparison to the General Population, and Genetic Structure Analysis

**Table S1.**

|  | NS | HA | RD | PS | SD | CO | ST |
| --- | --- | --- | --- | --- | --- | --- | --- |
| Novelty Seeking (NS) | **.90***** | -.14** | -.04 | -.28*** | -.32*** | -.20*** | .07 |
| Harm Avoidance (HA) | -.19*** | **.95***** | .15** | -.21*** | -.35*** | -.06 | .03 |
| Reward Dependence (RD) | .15** | .03 | **.93***** | .05 | .05 | .41*** | .04 |
| Persistence (PS) | -.25*** | -.18*** | .01 | **.89***** | .23*** | .20*** | .18*** |
| Self-directedness (SD) | -.13* | -.47*** | .07 | .20*** | **.93***** | .36*** | -.28*** |
| Cooperativeness (CO) | -.04 | -.05 | .49*** | 12* | .39*** | **.96***** | .10 |
| Self-transcendence (SD) | .13* | -.13* | .18*** | .15** | -.08 | .07 | **.91***** |

*Note*: ; * *P*< .05; ** *P*< .01,*** *P*< .001; *N* = 332.

**Table S2.**

|  | NS | HA | RD | PS | SD | CO | ST |
| --- | --- | --- | --- | --- | --- | --- | --- |
| Novelty Seeking (NS) | **.88***** | -.19*** | .19*** | -.16** | .04 | .05 | .08 |
| Harm Avoidance (HA) | -.18*** | **.95***** | .18** | -.18*** | -.43*** | -.06 | -.02 |
| Reward Dependence (RD) | .20*** | .16** | **.92***** | -.04 | .06 | .45*** | .08 |
| Persistence (PS) | -.18*** | -.14** | .08 | **.92***** | .15** | .06 | .20*** |
| Self-directedness (SD) | .05 | -.48*** | .13* | .26*** | **.93***** | .37*** | -.18*** |
| Cooperativeness (CO) | .12* | -.07 | .56*** | .16*** | .41*** | **.96***** | .03 |
| Self-transcendence (SD) | .04 | .05 | .22*** | .14** | -.12* | .15** | **.91***** |

*Note*: * *P* < .05; ** *P* < .01,*** *P* < .001; *N* = 399.

**Table S3.**

|  | NS | HA | RD | PS | SD | CO | ST |
| --- | --- | --- | --- | --- | --- | --- | --- |
| Novelty Seeking (NS) | - |  |  |  |  |  |  |
| Harm Avoidance (HA) | -.24*** | - |  |  |  |  |  |
| Reward Dependence (RD) | -.01 | .07*** | - |  |  |  |  |
| Persistence (PS) | -.20*** | -.18*** | .12*** | - |  |  |  |
| Self-directedness (SD) | -.21*** | -.41*** | .11*** | .19*** | - |  |  |
| Cooperativeness (CO) | -.18*** | -.06** | .40*** | .20*** | .38*** | - |  |
| Self-transcendence (SD) | .13*** | .00 | .05* | .19*** | -.32*** | .02 | - |

*Note*: * *P*<.05; ** *P*<.01;*** *P*<.001; *N* = 2714.
